# Supplementary material
Source: HighWire-hosted journal article supplement (https://rmdopen.bmj.com/content/4/2/e000755)
Supplement: inline-supplementary-material-1 [file inline-supplementary-material-1.docx]

**Supplementary Table 1.** Maximum Likelihood Estimates of trajectory-groups

| **ASDAS-CRP TRAJECTORIES** | | | **ASQOL TRAJECTORIES** | | |
| --- | --- | --- | --- | --- | --- |
|  | **Β-estimate** | **p-value** |  | **Β-estimate** | **p-value** |
| **Trajectory 1**  Intercept  Linear | 0.07  0.01 | 0.90  0.91 | **Trajectory 1**  Intercept  Linear | 1.62  -0.05 | <0.001  0.04 |
| **Trajectory 2**  Intercept  Linear  Quadratic | 5.56  -0.50  0.05 | <0.001  0.08  0.10 | **Trajectory 2**  Intercept  Linear  Quadratic | 2.78  -0.19  0.02 | <0.001  0.03  0.08 |
| **Trajectory 3**  Intercept  Linear  Quadratic  Cubic  Quartic | 8.76  -8.26  2.86  -0.41  0.02 | <0.001  <0.001  <0.001  0.001  0.03 | **Trajectory 3**  Intercept  Linear  Quadratic  Cubic  Quartic | 3.86  -2.39  0.83  -0.12  0.01 | <0.001  <0.001  <0.001  <0.001  0.01 |
| **Trajectory 4**  Intercept  Linear  Quadratic  Cubic  Quartic | 11.00  -4.39  2.07  -0.34  0.02 | <0.001  <0.001  0.01  0.01  0.02 | **Trajectory 4**  Intercept  Linear  Quadratic  Cubic  Quartic | 3.71  -1.42  0.57  -0.10  0.01 | <0.001  <0.001  <0.001  0.01  0.02 |
| **Trajectory 5**  Intercept  Linear  Quadratic  Cubic | 14.57  -1.46  0.45  -0.04 | <0.001  0.04  0.07  0.08 | **Trajectory 5**  Intercept  Linear  Quadratic  Cubic | 4.07  -0.61  0.14  -0.01 | <0.001  <0.001  0.02  0.07 |
| **Sigma** | 2.913 | <0.001 | **Sigma** | 0.748 | <0.001 |
